# Supplementary material
Source: Royal Society of Chemistry journal article supplement (doi:10.1039/d6gc01700b)
Supplement: d6gc01700b1.pdf [file d6gc01700b1.pdf]

## **Photocatalytic Water-Donating Transfer Semi-hydrogenation of Alkynes Coupled with Glycerol Oxidation over Pd-TiO<sub>2</sub>**

En Zhao<sup>a,b,c</sup>, Shaokang Zhai<sup>a,b</sup>, Jingyuan Su<sup>a,b</sup>, Hehe Fan<sup>a,b</sup>, Zhaohui Chen<sup>a,b</sup>, Ziyi Fan<sup>a,b</sup>, Wenjun Zhang<sup>a,b</sup>, Haijiao Lu<sup>c,\*</sup>, and Zupeng Chen<sup>a,b,\*</sup>

<sup>a</sup>State Key Laboratory for Development and Utilization of Forest Food Resources, Nanjing Forestry University, Nanjing 210037, China

<sup>b</sup>Jiangsu Co-Innovation Center of Efficient Processing and Utilization of Forest Resources, International Innovation Center for Forest Chemicals and Materials, Nanjing Forestry University, Longpan Road 159, Nanjing 210037, China

<sup>c</sup>Nanomaterials Centre, School of Chemical Engineering, and Australian Institute for Bioengineering and Nanotechnology, The University of Queensland, 4072 St Lucia, Brisbane, Australia

## **Table of Contents**

1. Supplementary Figures 1-13
2. Supplementary Tables 1-2
3. Supplementary References

## Supplementary Figures

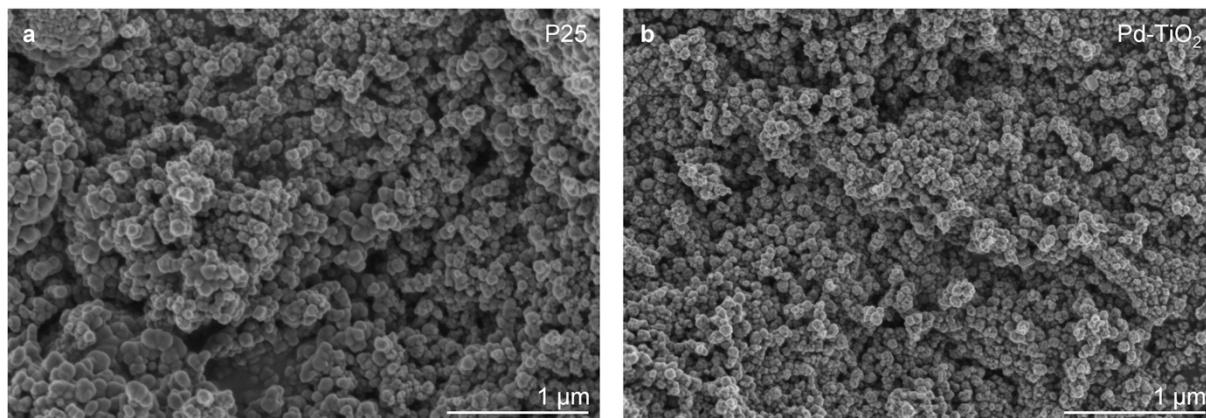

**Figure S1.** SEM images of (a) P25 and (b) Pd-TiO<sub>2</sub>.

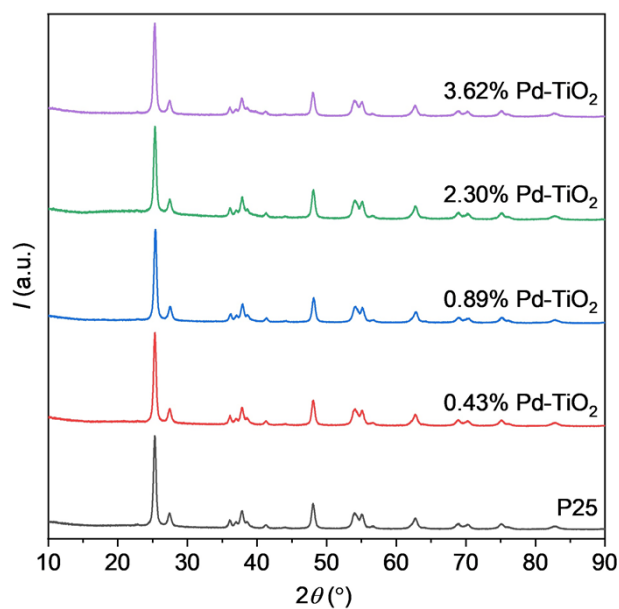

**Figure S2.** XRD patterns of P25 and Pd-TiO<sub>2</sub> with different Pd loadings.

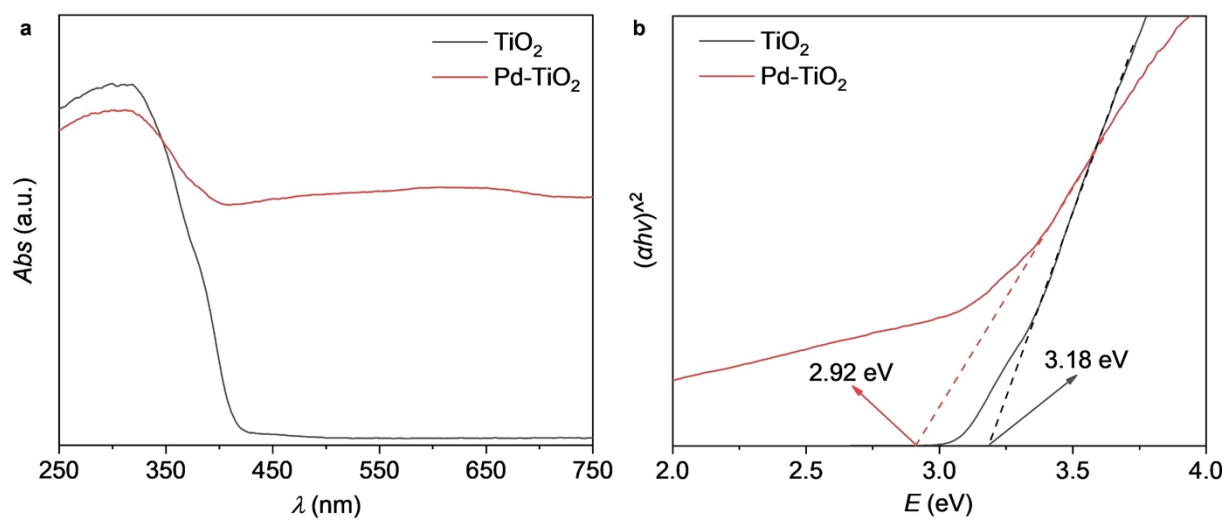

**Figure S3** (a) UV-vis absorption spectra and (b) Tauc plots of P25 and Pd-TiO<sub>2</sub>.

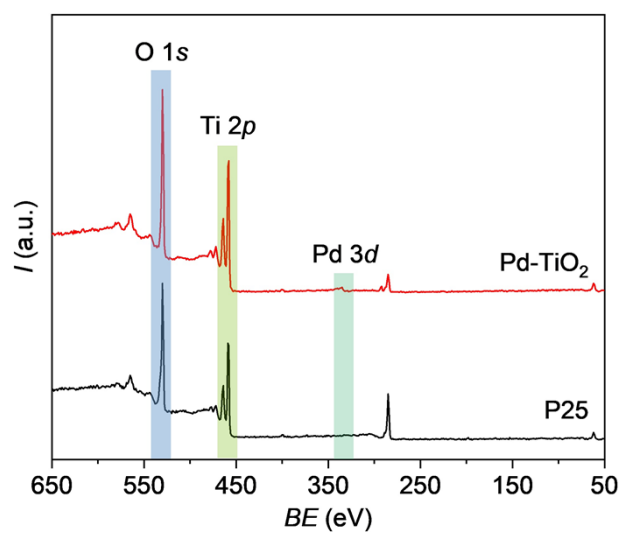

**Figure S4** XPS survey spectra of P25 and Pd-TiO<sub>2</sub>.

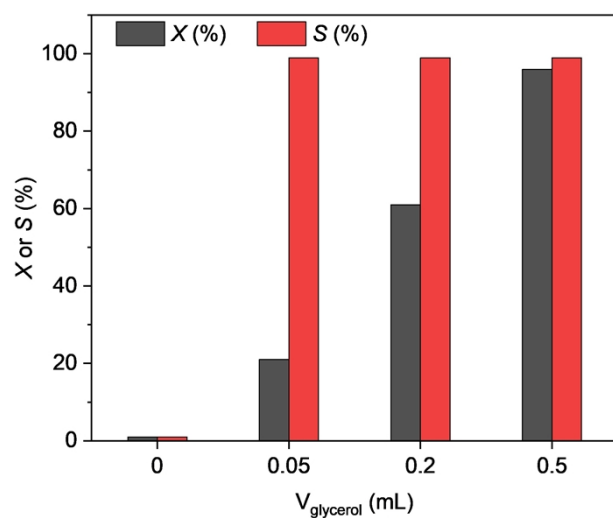

**Figure S5** Effect of the amount of glycerol on the photocatalytic semi-hydrogenation performance of phenylacetylene.

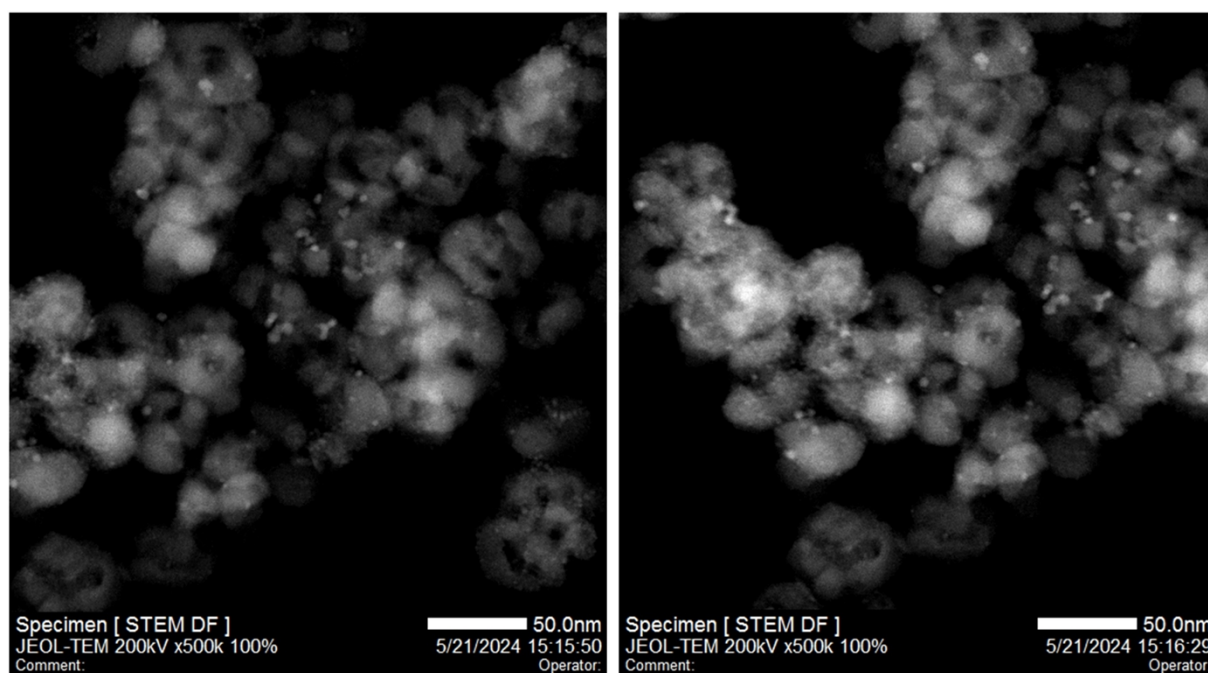

**Figure S6.** STEM images of the used Pd-TiO<sub>2</sub> after five consecutive reaction runs.

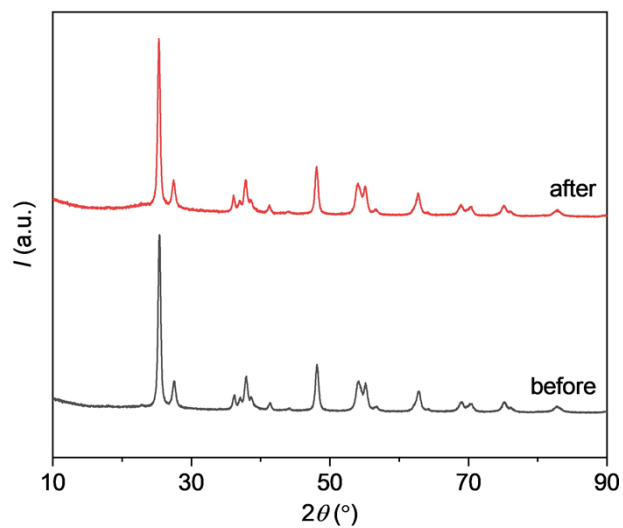

**Figure S7.** XRD patterns of Pd-TiO<sub>2</sub> before and after five consecutive reaction runs.

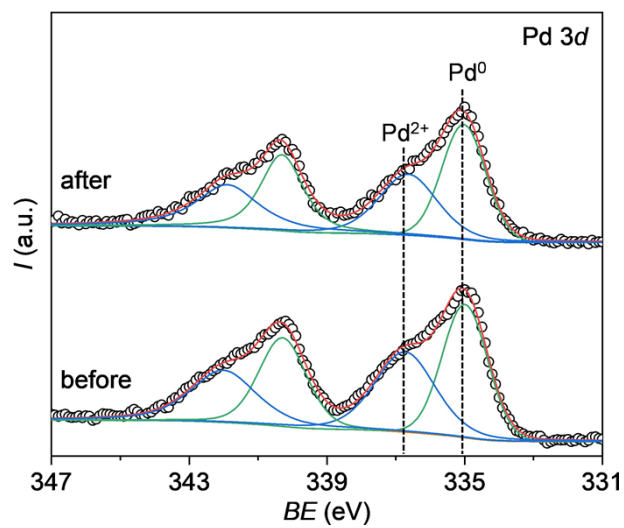

**Figure S8.** Pd 3d XPS spectra of Pd-TiO<sub>2</sub> before and after five consecutive reaction runs.

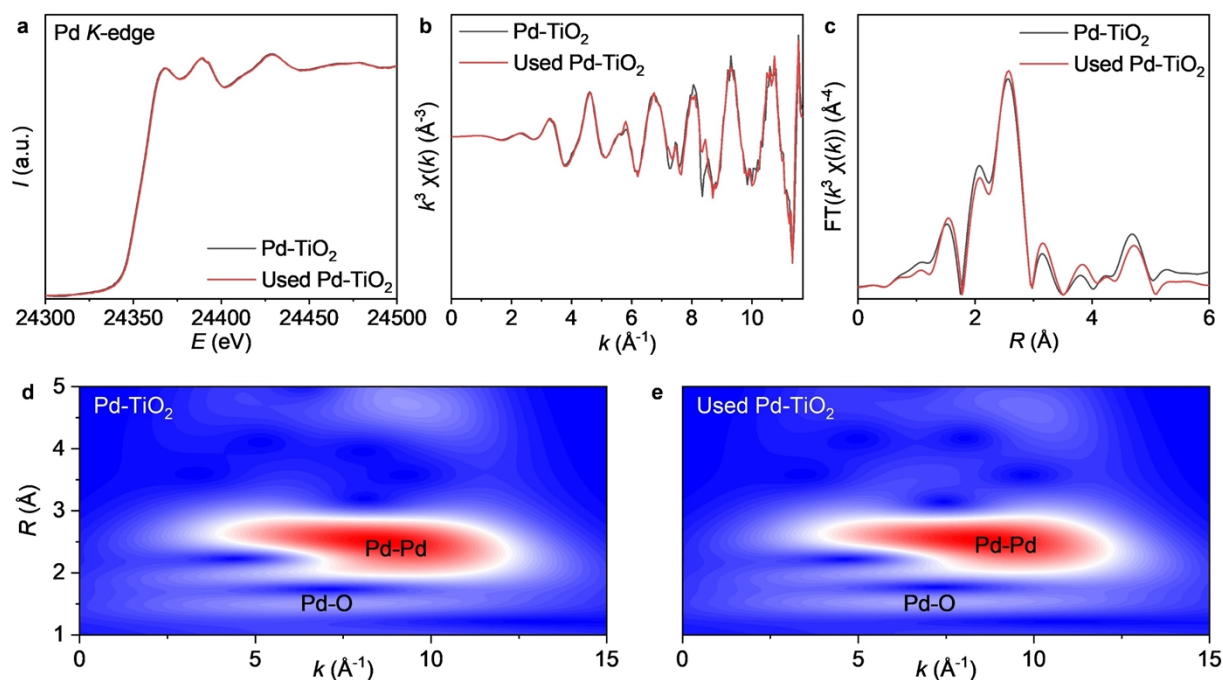

**Figure S9.** (a) Pd *K*-edge XANES spectra, (b)  $k^3$ -weighted Pd *K*-edge EXAFS spectra, and (c) Fourier transform of  $k^3$ -weighted Pd *K*-edge EXAFS spectra of Pd-TiO<sub>2</sub> and the used Pd-TiO<sub>2</sub>. Wavelet transform EXAFS spectra of (d) Pd-TiO<sub>2</sub> and (e) used Pd-TiO<sub>2</sub>.

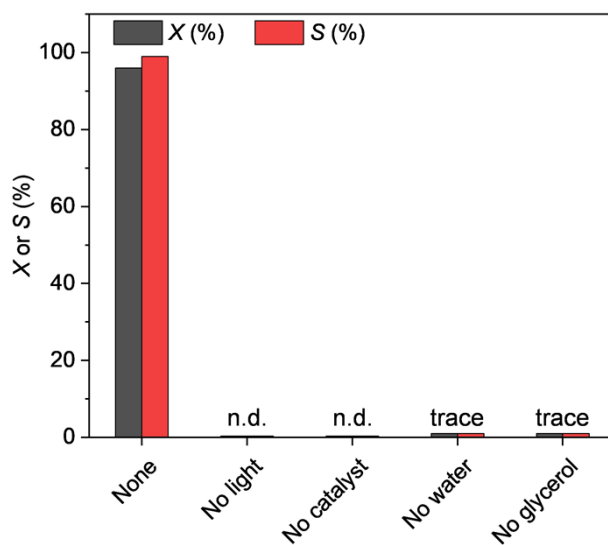

**Figure S10.** Photocatalytic water-donating transfer semi-hydrogenation with the oxidation of glycerol reactions under various conditions.

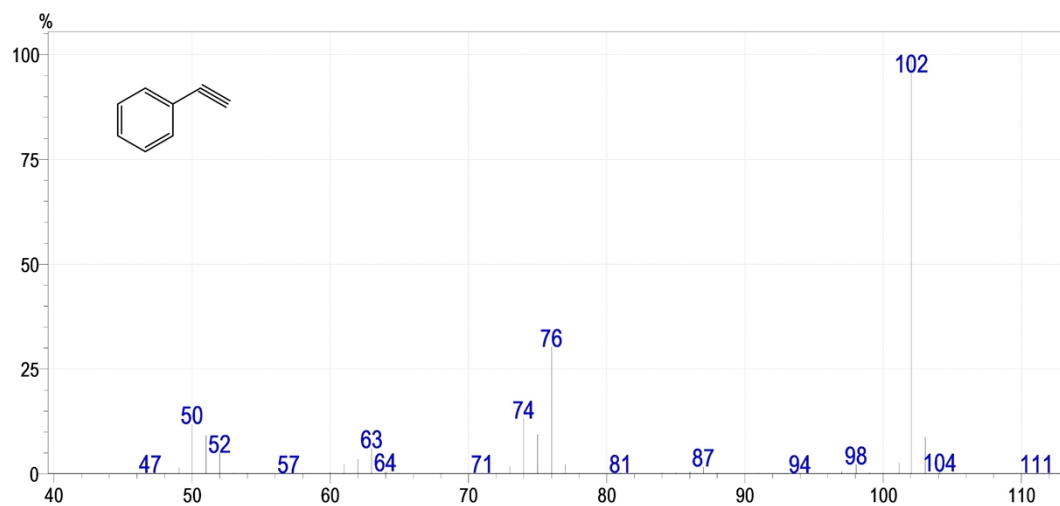

Figure S11. Mass spectrum of phenylacetylene.

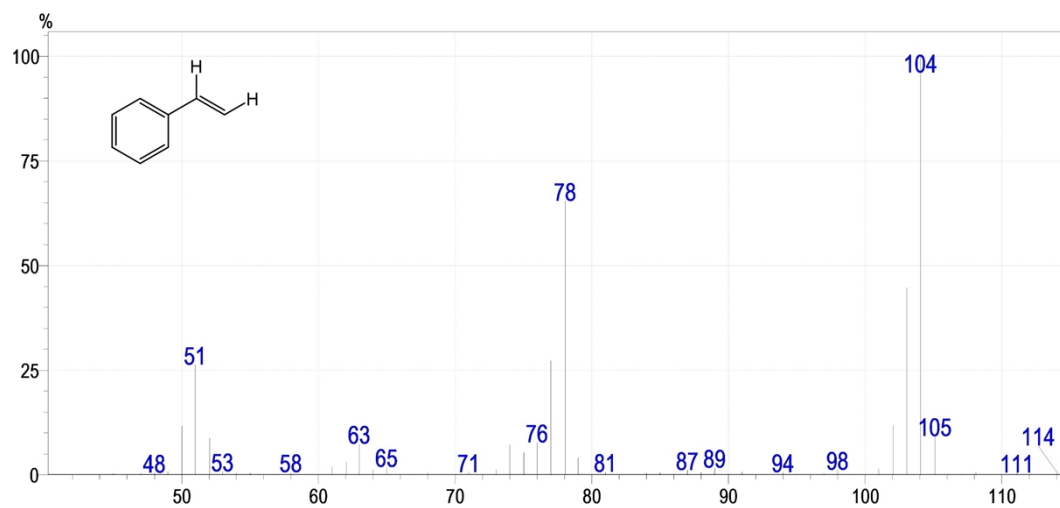

Figure S12. Mass spectrum of styrene.

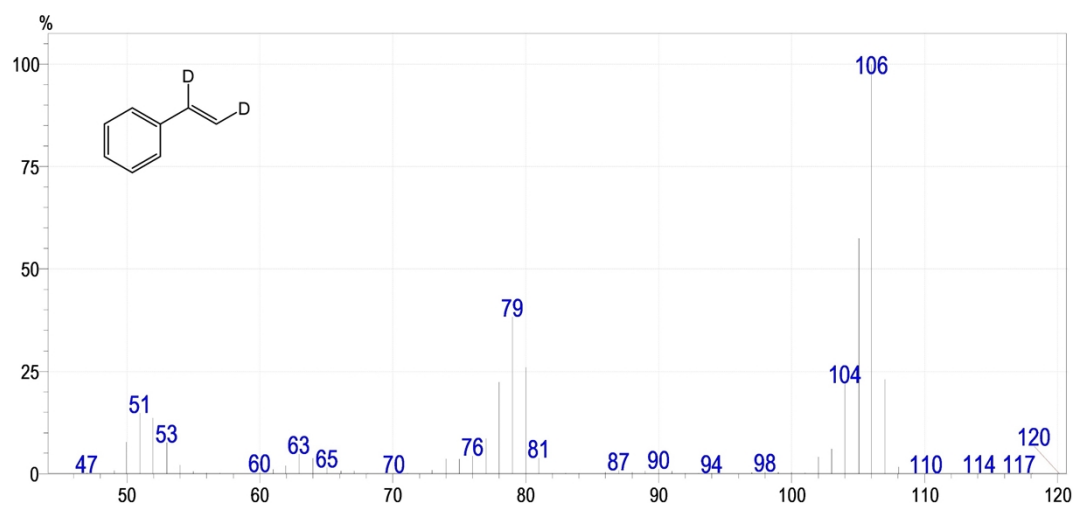

**Figure S13.** Mass spectrum of deuterated styrene.

## Supplementary Table

**Table S1.** Metal loading for different photocatalysts.

| Sample                   | $M^{[a]}$ (wt.%) |
|--------------------------|------------------|
| Pd-TiO <sub>2</sub>      | 0.43 (0.50)      |
|                          | 0.89 (1.00)      |
|                          | 2.30 (2.50)      |
|                          | 3.62 (5.00)      |
| Pt-TiO <sub>2</sub>      | 0.72 (1.00)      |
| Au-TiO <sub>2</sub>      | 0.86 (1.00)      |
| Ru-TiO <sub>2</sub>      | 0.61 (1.00)      |
| Ni-TiO <sub>2</sub>      | 1.05 (1.00)      |
| Used Pd-TiO <sub>2</sub> | 0.80             |

<sup>[a]</sup> ICP-OES (in parentheses, theoretical loading).

**Table S2.** Comparison of the photocatalytic water-donating hydrogenation systems for semi-hydrogenation of alkynes reported in the literature with that of the present system.

| Catalyst                                              | Hydrogen source | Hole sacrificial agent | Additive    | $X$ (%)   | $S$ (%)   | Reference        |
|-------------------------------------------------------|-----------------|------------------------|-------------|-----------|-----------|------------------|
| <b>Pd-TiO<sub>2</sub></b>                             | <b>Water</b>    | <b>Glycerol</b>        | <b>None</b> | <b>96</b> | <b>99</b> | <b>This work</b> |
| Cu/TiO <sub>2</sub>                                   | Water           | Glycerol               | NaOH        | 99        | 63        | Ref. S1          |
| TiO <sub>2</sub> -Pd <sub>0.5</sub> Pt <sub>0.5</sub> | Water           | Methanol               | None        | 100       | 94        | Ref. S2          |
| Pd/TiO <sub>2</sub>                                   | Water           | Methanol               | None        | 99        | 99        | Ref. S3          |
| Ni/C <sub>3</sub> N <sub>4</sub>                      | Water           | Triethylamine          | None        | 100       | 97        | Ref. S4          |
| Ni-N/CN                                               | Water           | Triethylamine          | None        | 100       | 92        | Ref. S5          |

## Supplementary References

1. H. Kominami, R. Akamata, and A. Tanaka, *Appl. Catal. A-Gen.*, **2024**, 675, 119635.
2. M. Li, N. Zhang, R. Long, W. Ye, C. Wang and Y. Xiong, *Small*, **2017**, 13, 1604173.
3. Q.-C. Wei, Y. Chen, Z. Wang, D.-Z. Yu, W.-H. Wang, J.-Q. Li, L.-H. Chen, Y. Li, B.-L. Su, *Angew. Chem. Int. Ed.*, **2022**, 61, e202210573.
4. T. Jia, D. Meng, H. Ji, H. Sheng, C. Chen, W. Song and J. Zhao, *Appl. Catal. B Environ.*, **2022**, 304, 121004.
5. T. Jia, D. Meng, R. Duan, H. Ji, H. Sheng, C. Chen, J. Li, W. Song and J. Zhao, *Angew. Chem. Int. Ed.*, **2023**, 62, e202216511
